# Supplementary material for: Green synthesis of porous β-cyclodextrin polymers for rapid and efficient removal of organic pollutants and heavy metal ions from water
Source: Royal Society of Chemistry journal article supplement (doi:10.1039/c8nj03438a), 2018-01-01
Supplement: c8nj03438a1.pdf [file c8nj03438a1.pdf]

## Supporting Information

# Green Synthesis of Porous $\beta$ -Cyclodextrin Polymer for Rapid and Efficient Removal of Organic Pollutants and Heavy Metal Ions from Water

Tingting Yu<sup>a</sup>, Zhimin Xue<sup>b\*</sup>, Xinhui Zhao<sup>a</sup>, Wenjun Chen<sup>a</sup>, and Tiancheng Mu<sup>a\*</sup>

<sup>a</sup> Department of Chemistry, Renmin University of China, Beijing 100872, China.

<sup>b</sup> Beijing Key Laboratory of Lignocellulosic Chemistry, College of Materials Science and Technology, Beijing Forestry University, Beijing 100083, China.

\*Corresponding author. E-mail: [zmxue@bjfu.edu.cn](mailto:zmxue@bjfu.edu.cn); [tcmu@ruc.edu.cn](mailto:tcmu@ruc.edu.cn)

---

### 1 **Synthesis of CS-EDTA**

2 After drying in vacuum, a total of 1 g of chitosan was dissolved in 20 mL of 10 vol. % aqueous acetic  
3 acid solution and then diluted five times with methanol. After that 4.77 g of EDTA anhydride (18.6  
4 mmol) suspended in methanol was added to this solution and stirred vigorously for about 24 h at  
5 room temperature. The precipitate was further mixed with ethanol and stirred for another 16 h.  
6 It was then washed with NaOH solution (pH 11) to eliminate unreacted EDTA. The precipitate was  
7 washed with deionized water, 0.1 M HCl, again deionized water, and ethanol. At last, the product  
8 was dried under vacuum for 48 h and stored in a desiccator.

9

### 10 **Synthesis of P-CDSA**

11  $\beta$ -CD (1 g, 0.88 mmol), SA (0.335 g), and  $K_2CO_3$  (1.5 g, 10.85 mmol) were suspended in 4.5 mL of  
12 deionized  $H_2O$  and sonicated for 10 min. PFP (0.25 mL, 2.57 mmol) and MeTHF (40 mL) were added  
13 to a 100 mL pressure vessel equipped with a magnetic stir bar. The mixed  $\beta$ -CD solution was then  
14 added dropwise to the MeTHF solution and the contents were bubbled with  $N_2$  for 5 min. The  $N_2$   
15 inlet was removed, the pressure vessel sealed, and the mixture placed on a hot stirring plate (80  
16  $^{\circ}C$ ) and stirred at 500 rpm for 48h. The yellow solid was filtered and washed with 1 M HCl until  $CO_2$   
17 evolution stopped to remove the residual  $K_2CO_3$ . The recovered yellow solid was washed with  $H_2O$   
18 and  $C_2H_5OH$  for several times. The product was filtered and dried under high vacuum for 24h at  
19 room temperature.

20

### 21 **Synthesis of P-CDMCC**

22  $\beta$ -CD (1 g, 0.88 mmol), MCC (0.335 g), and  $K_2CO_3$  (1.5 g, 10.85 mmol) were suspended in 4.5 mL of  
23 deionized  $H_2O$  and sonicated for 20 min. PFP (0.3 mL, 3.08 mmol) and MeTHF (40 mL) were added  
24 to a 100 mL pressure vessel equipped with a magnetic stir bar. The mixed  $\beta$ -CD solution was then  
25 added dropwise to the MeTHF solution and the contents were bubbled with  $N_2$  for 5 min. The  $N_2$   
26 inlet was removed, the pressure vessel sealed, and the mixture placed on a hot stirring plate (80  
27  $^{\circ}C$ ) and stirred at 500 rpm for 48h. The yellow solid was filtered and washed with 1 M HCl until  $CO_2$   
28 evolution stopped to remove the residual  $K_2CO_3$ . The recovered yellow solid was washed with  $H_2O$   
29 and  $C_2H_5OH$  for several times. The product was filtered and dried under high vacuum for 24h at  
30 room temperature.

---

1

## 2 **Synthesis of P-CDAL**

3  $\beta$ -CD (1 g, 0.88 mmol), AL (0.335 g), and  $K_2CO_3$  (1.5 g, 10.85 mmol) were suspended in 4.5 mL of  
4 deionized  $H_2O$  and sonicated for 10 min. PFP (0.3 mL, 3.08 mmol) and MeTHF (40 mL) were added  
5 to a 100 mL pressure vessel equipped with a magnetic stir bar. The mixed  $\beta$ -CD solution was then  
6 added dropwise to the MeTHF solution and the contents were bubbled with  $N_2$  for 5 min. The  $N_2$   
7 inlet was removed, the pressure vessel sealed, and the mixture placed on a hot stirring plate (80  
8  $^{\circ}C$ ) and stirred at 500 rpm for 48h. The brown solid was filtered and washed with 1 M HCl until  $CO_2$   
9 evolution stopped to remove the residual  $K_2CO_3$ . The recovered brown solid was washed with  $H_2O$   
10 and  $C_2H_5OH$  for several times. The product was filtered and dried under high vacuum for 24h at  
11 room temperature.

12

## 13 **Synthesis of P-CD**

14  $\beta$ -CD (1 g, 0.88 mmol),  $K_2CO_3$  (1.5 g, 10.85 mmol), PFP (0.25 mL, 2.57 mmol) and MeTHF (40 mL)  
15 were added to a 100 mL pressure vessel equipped with a magnetic stir bar. The contents were  
16 bubbled with  $N_2$  for 5 min. The  $N_2$  inlet was removed, the pressure vessel sealed, and the mixture  
17 placed on a hot stirring plate (80  $^{\circ}C$ ) and stirred at 500 rpm for 48h. The brown solid was filtered  
18 and washed with 1 M HCl until  $CO_2$  evolution stopped to remove the residual  $K_2CO_3$ . The recovered  
19 yellow solid was washed with  $H_2O$  and  $C_2H_5OH$  for several times. The product was filtered and  
20 dried under high vacuum for 24h at room temperature.

21

## 22 **Synthesis of EPI-CDP**

23  $\beta$ -CD (0.300 g, 2.64 mmol) was dissolved in aqueous NaOH (6.5 M, 5.00 mL) and epichlorohydrin  
24 (2.50 mL, 32.4 mmol) was added to this solution dropwise while stirring vigorously at 60  $^{\circ}C$ . The  
25 reactant turned into a yellow gel within 1 h and was soaked in deionized  $H_2O$  for 30 min. The solid  
26 was then washed and filtered with deionized  $H_2O$  and  $C_2H_5OH$  for several times. The product was  
27 dried under high vacuum for 24 h at room temperature to give EPI cross-linked  $\beta$ -CD polymer (EPI-  
28 CDP) as a white powder.<sup>1</sup>

29

30 Measurement of molecular weight

---

1 MCC

2 The cellulose samples were dissolved in a standard reagent of  $1 \text{ mol L}^{-1}$  copper(II)-ethylenediamine  
3 (Cuen), and then intrinsic viscosity measurements were completed using an Ubbelodhe  
4 viscometer. The calculated molecular weight of microcrystalline cellulose is  $4.9 \times 10^4$ .

5

6 CS

7 The chitosan samples were dissolved in reagent of  $0.2 \text{ mol L}^{-1}$  NaCl and  $0.3 \text{ mol L}^{-1}$   $\text{CH}_3\text{COOH}$ . Then  
8 intrinsic viscosity measurements were completed using an Ubbelodhe viscometer. The calculated  
9 molecular weight of chitosan is  $3.4 \times 10^5$ .

10

11 SA

12 The sodium alginate samples were dissolved in reagent of  $0.1 \text{ mol L}^{-1}$  NaCl. Then intrinsic viscosity  
13 measurements were completed using an Ubbelodhe viscometer. The calculated molecular weight  
14 of sodium alginate is  $4.1 \times 10^5$ .

---

1 Degree of substitution

2 The degree of substitution of EDTA is measured by back titration. the sample of CS-EDTA was firstly

3 immersed in an excess 0.1 M HCl solution for 2h to make sure all the carboxylate groups were

4 converted into carboxylic acid. Then the sample was rinsed with deionized water, methanol

5 successively and dried in vacuum at 60°C overnight. The amount of free carboxylic acid groups on

6 CS-EDTA was determined by a typical back titration procedure: 100 mg of CS-EDTA was stirred in

7 100 mL of 0.01 M NaOH aqueous solution for 2 h. Under a gentle stirring, the excess NaOH in the

8 solution was back-titrated by a 0.01 M HCl solution to reach the neutral point (determined by a pH

9 meter, LICHEN PH-100B).

10 The calculated degree of substitution of EDTA is 31%.

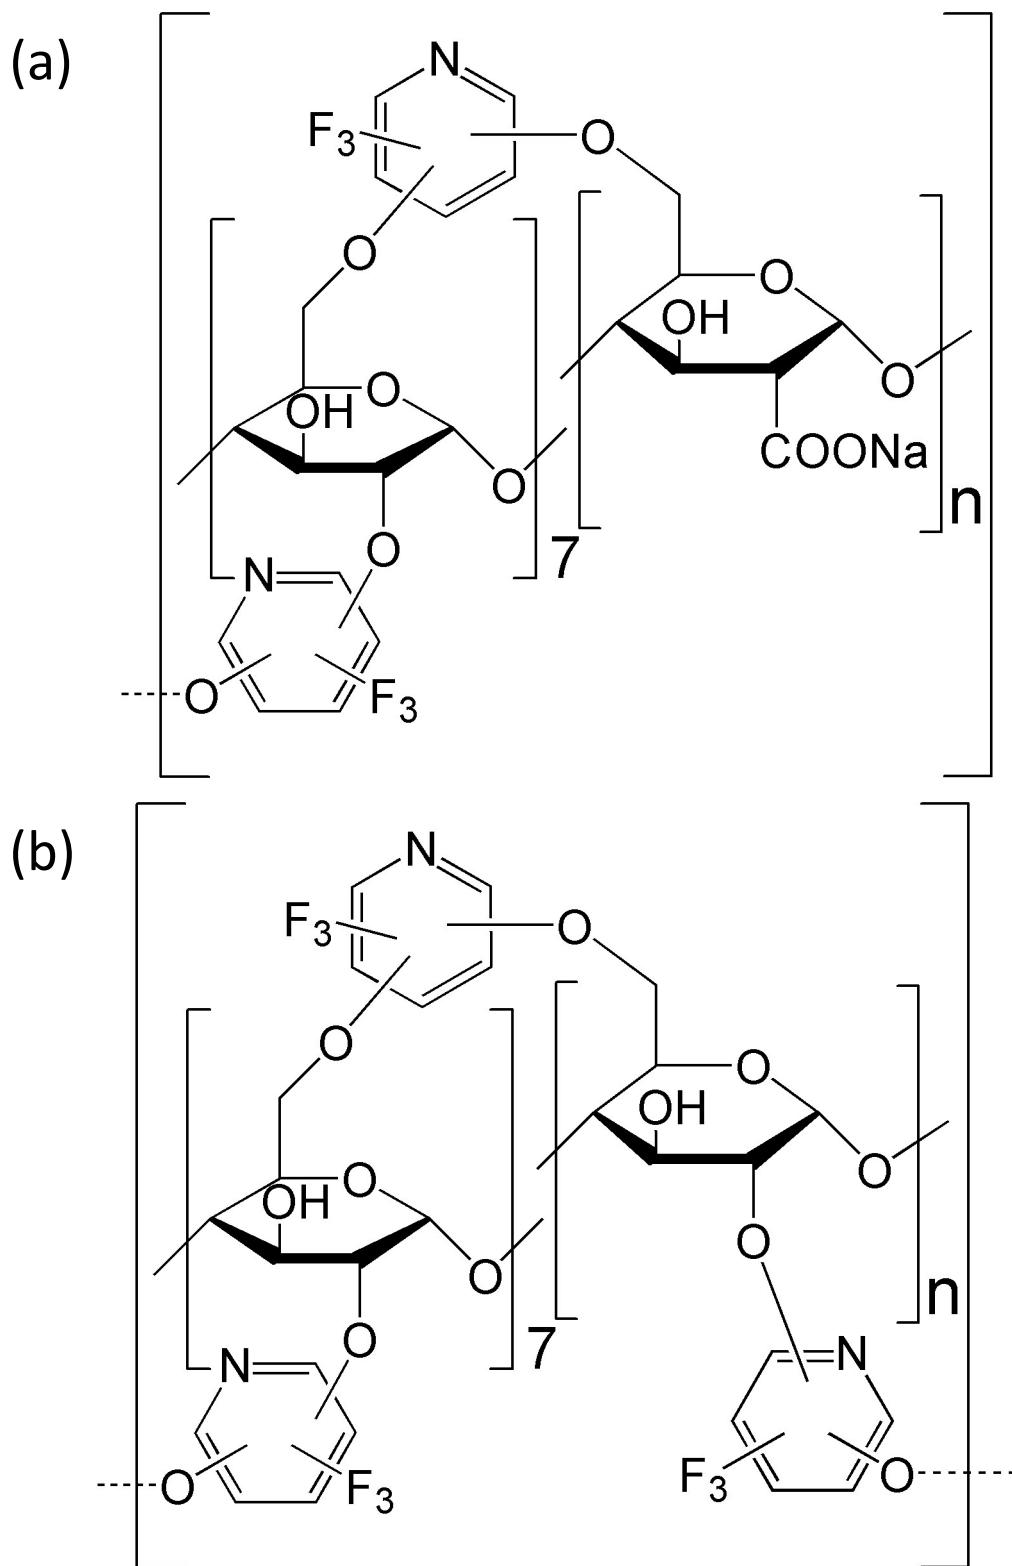

Fig. S1 Structures of (a) P-CDSA and (b) P-CDMCC.

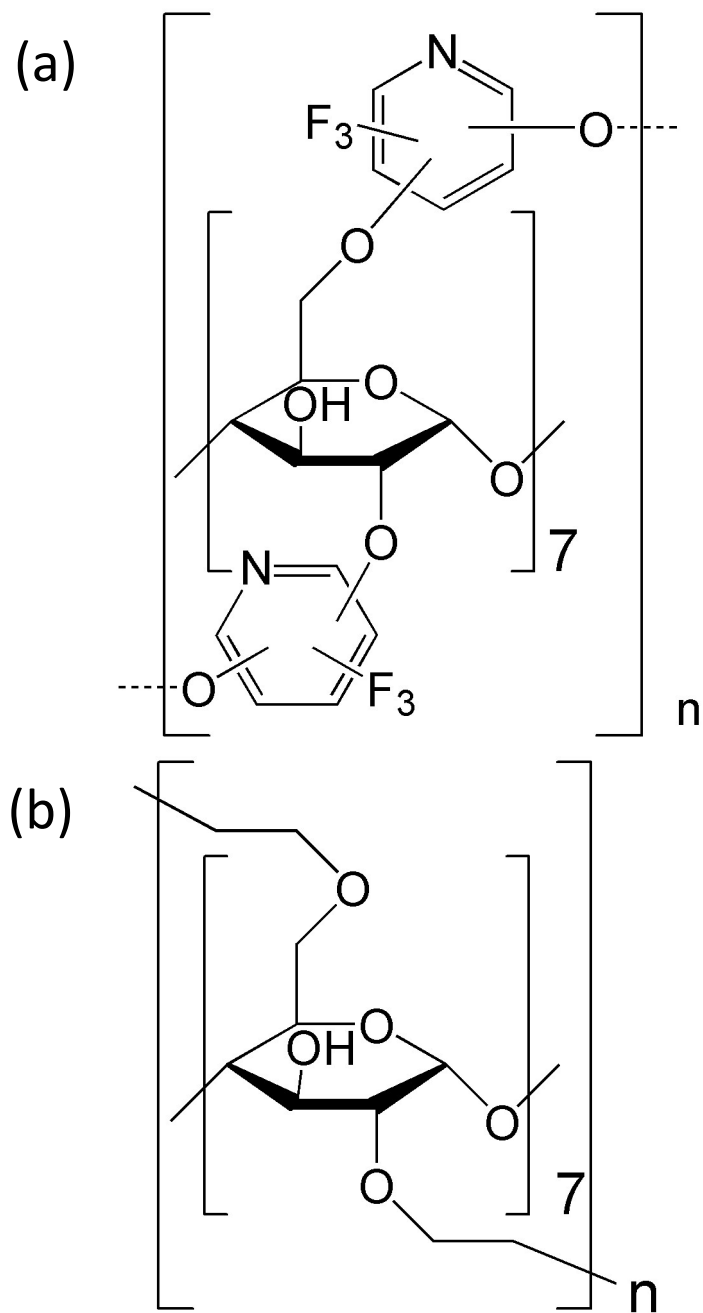

Fig. S2 Structures of (a) P-CD and (b) EPI-CDP.

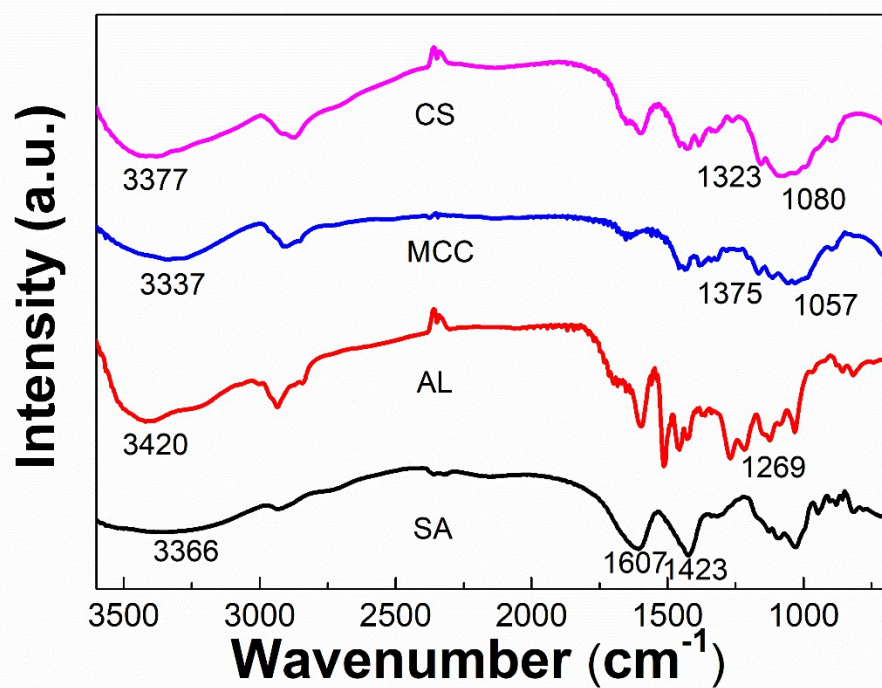

Fig. S3 The FT-IR spectrum of chitosan (CS), microcrystalline cellulose (MCC), alkali lignin (AL), and sodium alginate (SA).



Table S1 Synthesis conditions of a series of hierarchical porous polymers.

| Product | Reactants                 | Solvents                | Temperature |
|---------|---------------------------|-------------------------|-------------|
| P-CDEC  | $\beta$ -CD, CS-EDTA, PFP | MeTHF, H <sub>2</sub> O | 80 °C       |
| P-CDSA  | $\beta$ -CD, SA, PFP      | MeTHF, H <sub>2</sub> O | 80 °C       |
| P-CDMCC | $\beta$ -CD, MCC, PFP     | MeTHF, H <sub>2</sub> O | 80 °C       |
| P-CDAL  | $\beta$ -CD, AL, PFP      | MeTHF, H <sub>2</sub> O | 80 °C       |
| P-CD    | $\beta$ -CD, PFP          | MeTHF, DMF              | 80 °C       |
| P-CDEC2 | $\beta$ -CD, CS-EDTA, PFP | MeTHF, H <sub>2</sub> O | 90 °C       |
| P-CDEC3 | $\beta$ -CD, CS-EDTA, PFP | MeTHF, DMF              | 80 °C       |
| P-CDP   | $\beta$ -CD, TFP          | THF, DMF                | 85 °C       |
| P-CDEC4 | $\beta$ -CD, CS-EDTA, TFP | MeTHF, H <sub>2</sub> O | 80 °C       |
| P-CDEC5 | $\beta$ -CD, CS-EDTA, TFP | MeTHF, H <sub>2</sub> O | 90 °C       |
| P-CDEC6 | $\beta$ -CD, CS-EDTA, TFP | MeTHF, DMF              | 80 °C       |
| P-CDEC7 | $\beta$ -CD, CS-EDTA, PFP | THF, DMF                | 80 °C       |
| P-CDEC  | $\beta$ -CD, CS-EDTA, TFP | THF, DMF                | 80 °C       |

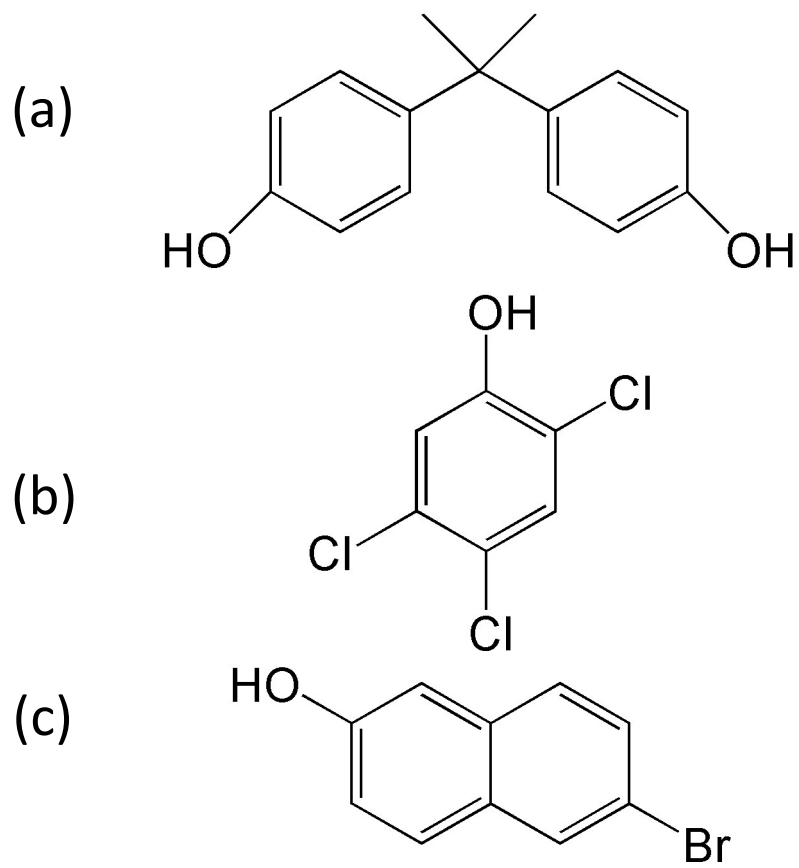

Fig. S4 Structures of (a) BPA, (b) TCP, and (c) BNP.

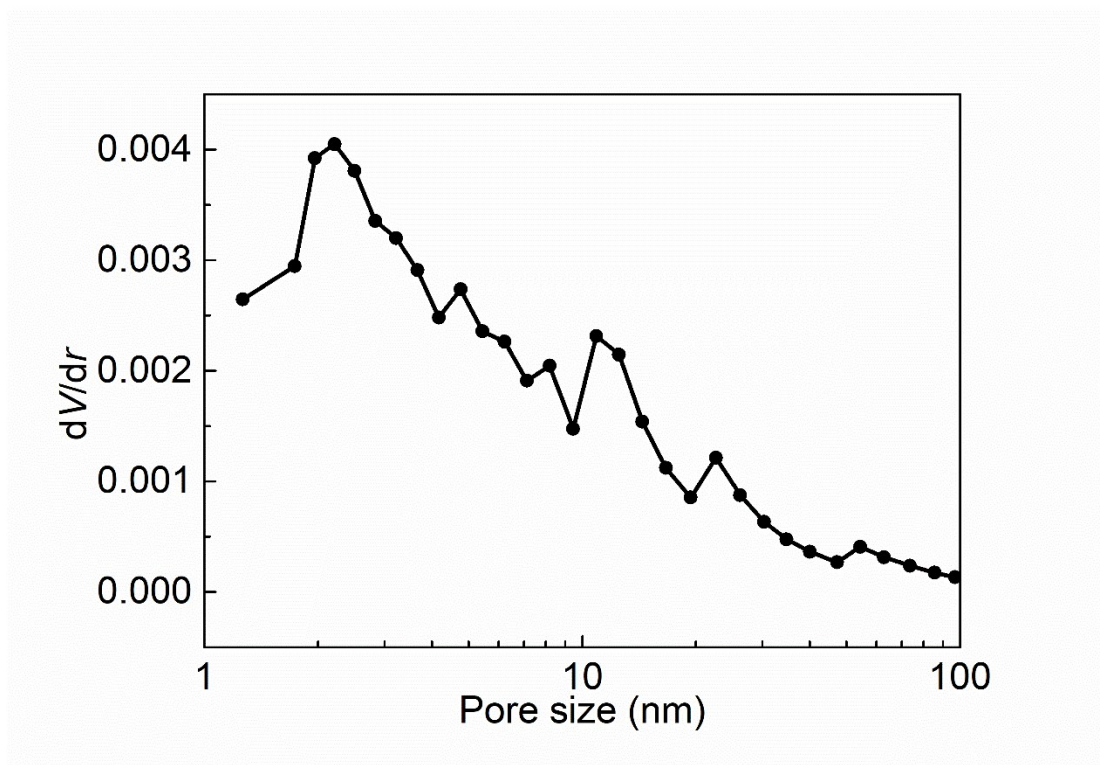

Fig. S5 Pore size distribution of P-CDEC (1-100nm).

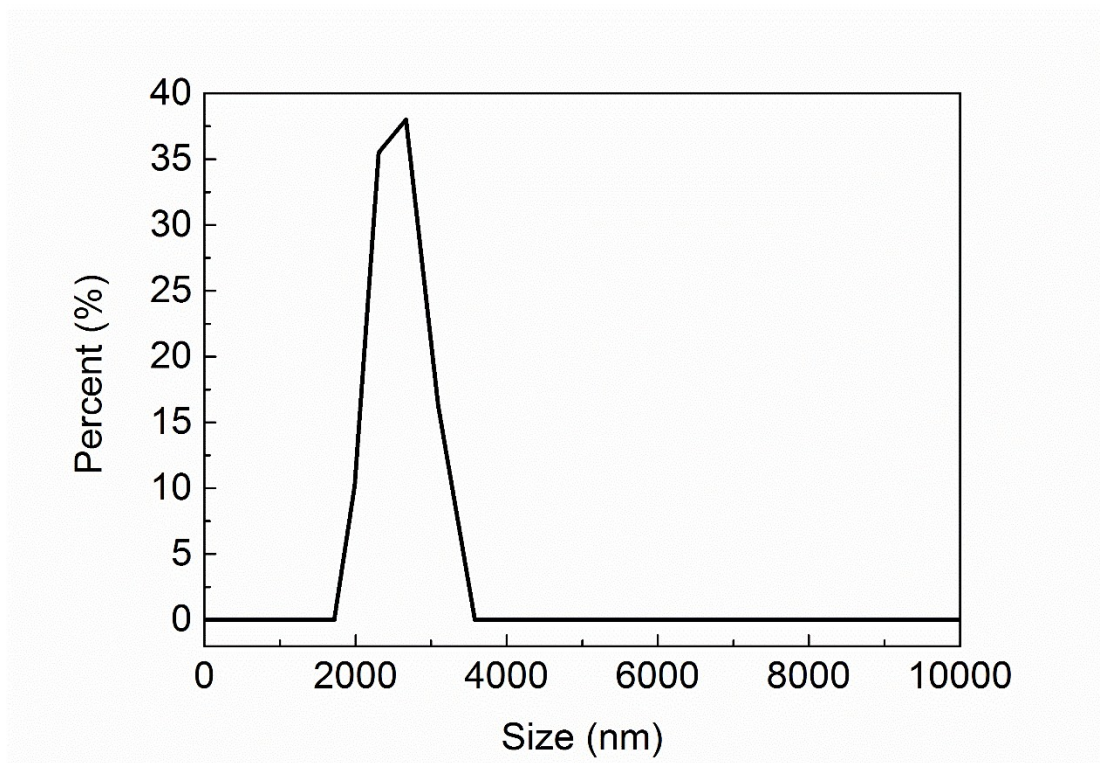

Fig. S6 Size image of P-CDEC.

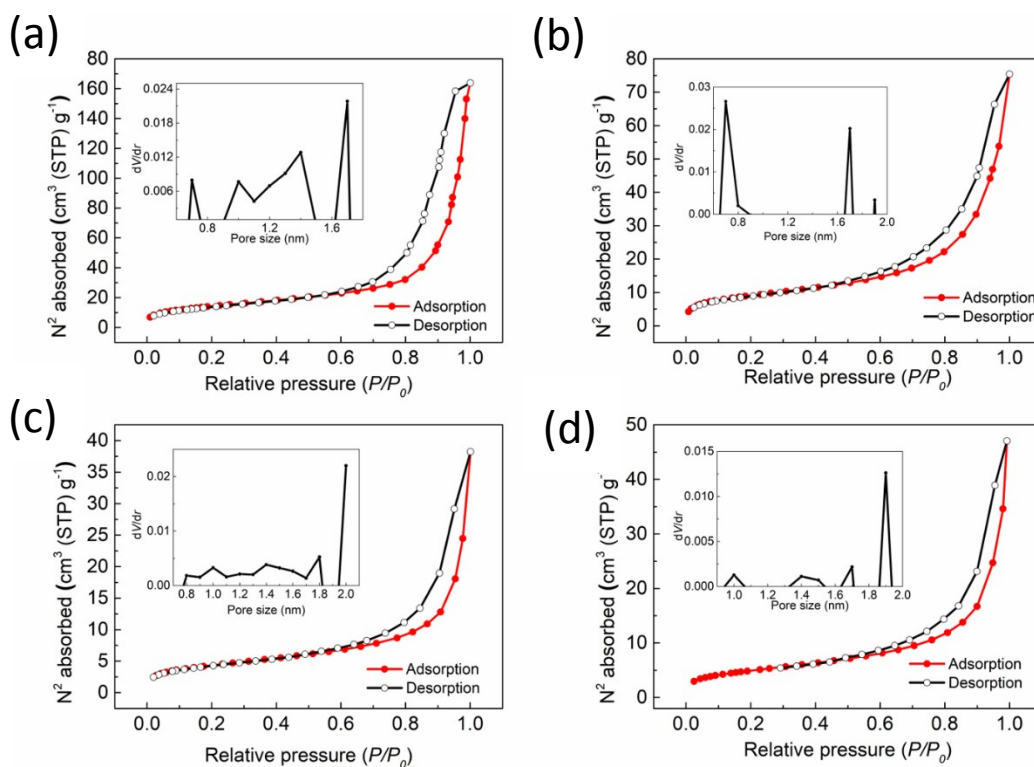

Fig. S7  $N_2$  adsorption-desorption isotherms and pore size distribution (inset) of (a) P-CDSA, (b) P-CDMCC, (c) P-CDAL, and (d) P-CD measured at 77 K. The Brunauer–Emmett–Teller specific surface areas of (a) P-CDSA, (b) P-CDMCC, (c) P-CDAL, and (d) P-CD are  $51.5\text{ m}^2\text{ g}^{-1}$ ,  $32.4\text{ m}^2\text{ g}^{-1}$ ,  $15.6\text{ m}^2\text{ g}^{-1}$ , and  $17.8\text{ m}^2\text{ g}^{-1}$  respectively.

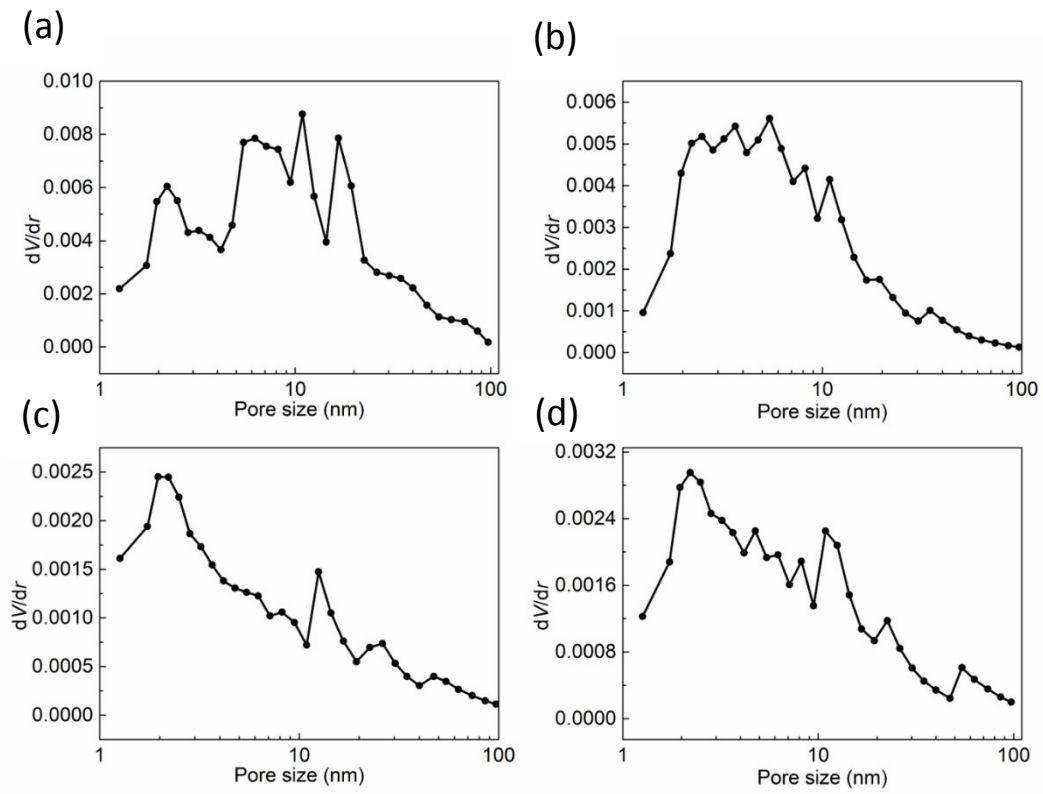

Fig. S8 Pore size distribution of (a) P-CDSA, (b) P-CDMCC, (c) P-CDAL, and (d) P-CD (1-100nm).

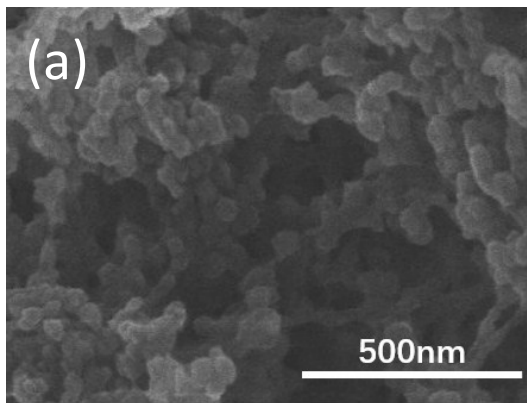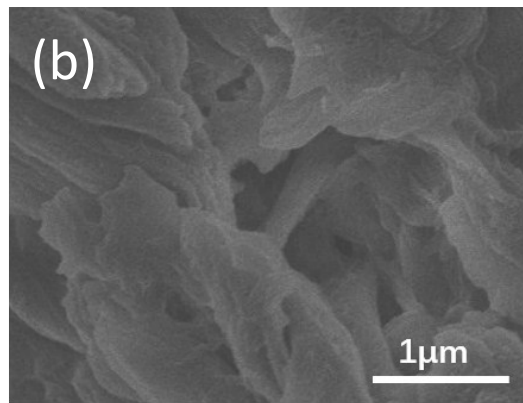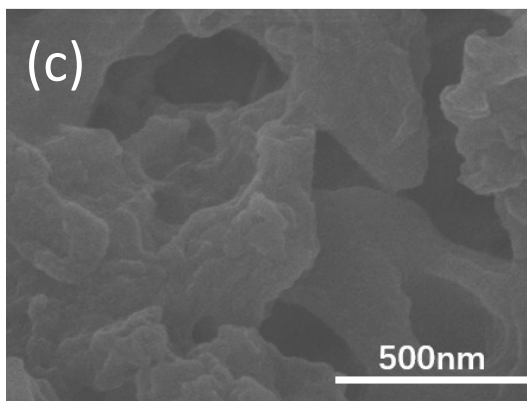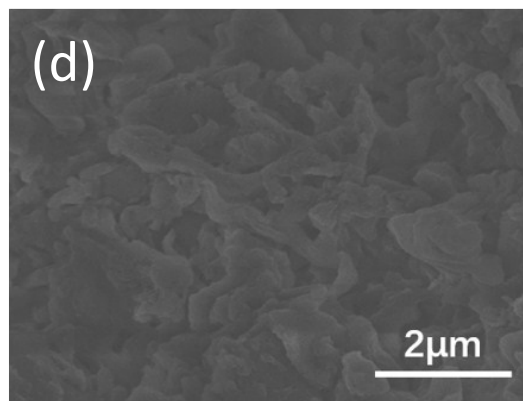

Fig. S9 SEM images of (a) P-CDSA, (b) P-CDMCC, (c) P-CDAL, and (d) P-CD.

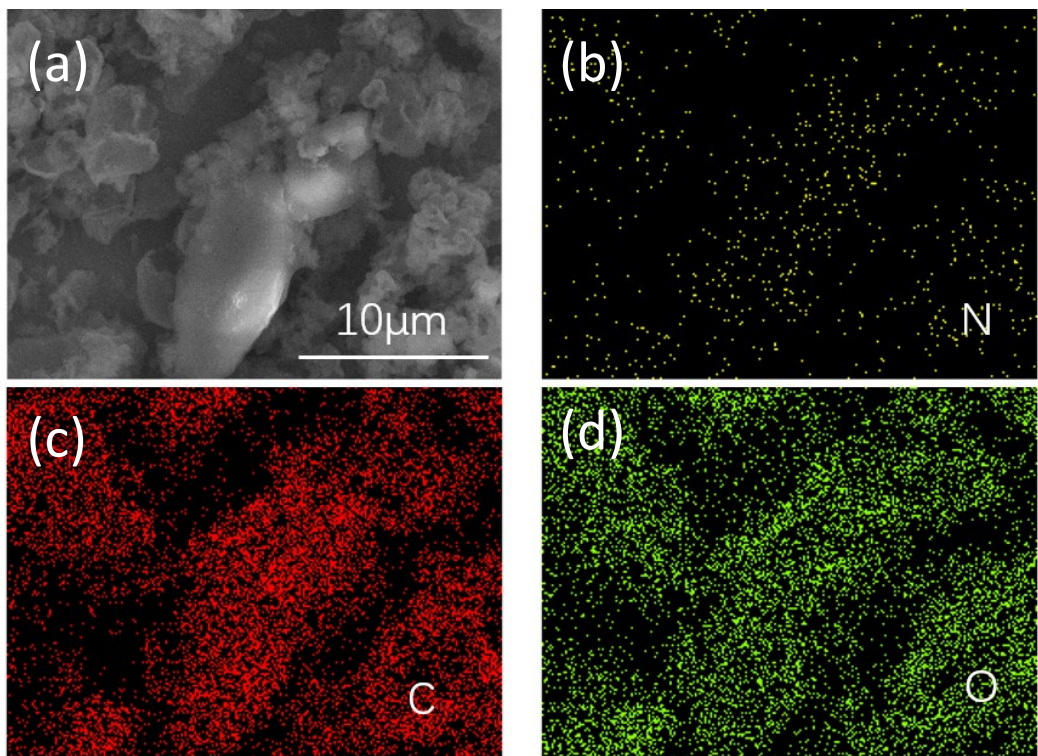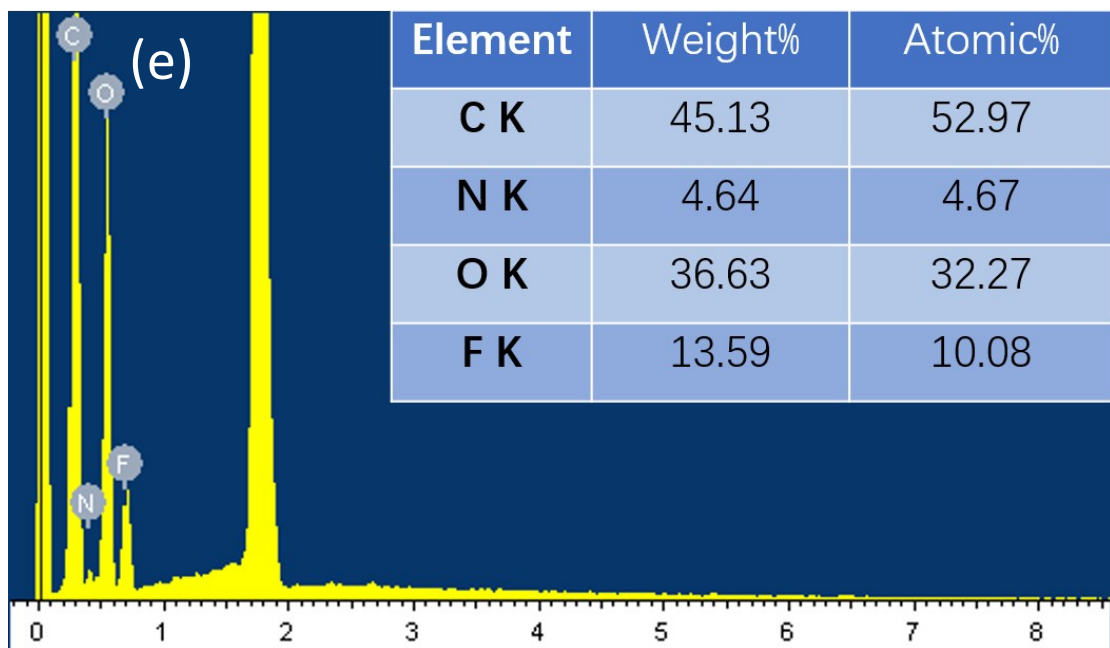

Fig. S10 (a) TEM of P-CDEC. X-ray mapping of N, C and O are shown in (b) (c) and (d). (e) EDX spectra of P-CDEC.

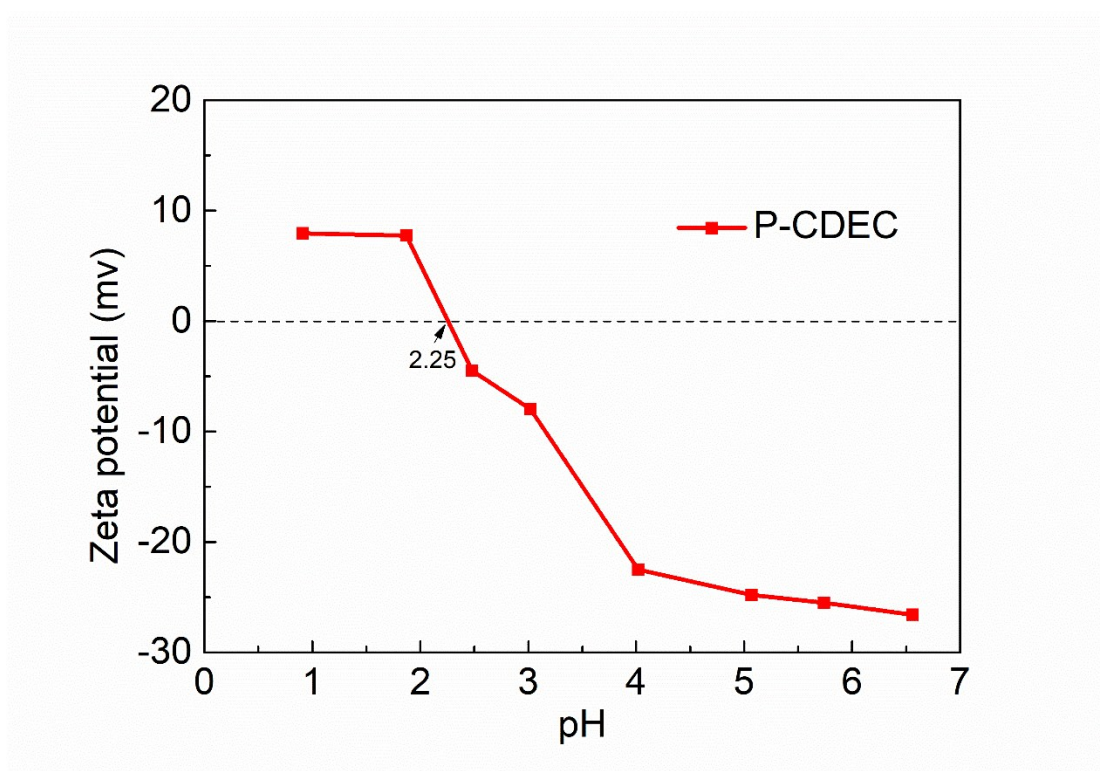

Fig. S11 Zeta potentials of P-CDEC as a function of solution pH.

Table S2 Parameters of adsorption kinetics of pollutants onto P-CDEC fitted by pseudo-second-order model.

| Pollutants | $q_e$ (mg g <sup>-1</sup> ) | $k_2$ (g mg <sup>-1</sup> min <sup>-1</sup> ) | $R^2$  |
|------------|-----------------------------|-----------------------------------------------|--------|
| Pb(II)     | 24.7                        | 18.64                                         | 0.9998 |
| Ni(II)     | 23.5                        | 0.95                                          | 0.9978 |
| Cu(II)     | 24.5                        | 1.30                                          | 0.9998 |
| BPA        | 10.6                        | 1.60                                          | 0.9998 |
| TCP        | 9.2                         | 4.93                                          | 0.9998 |
| BNP        | 10.4                        | 5.33                                          | 0.9998 |



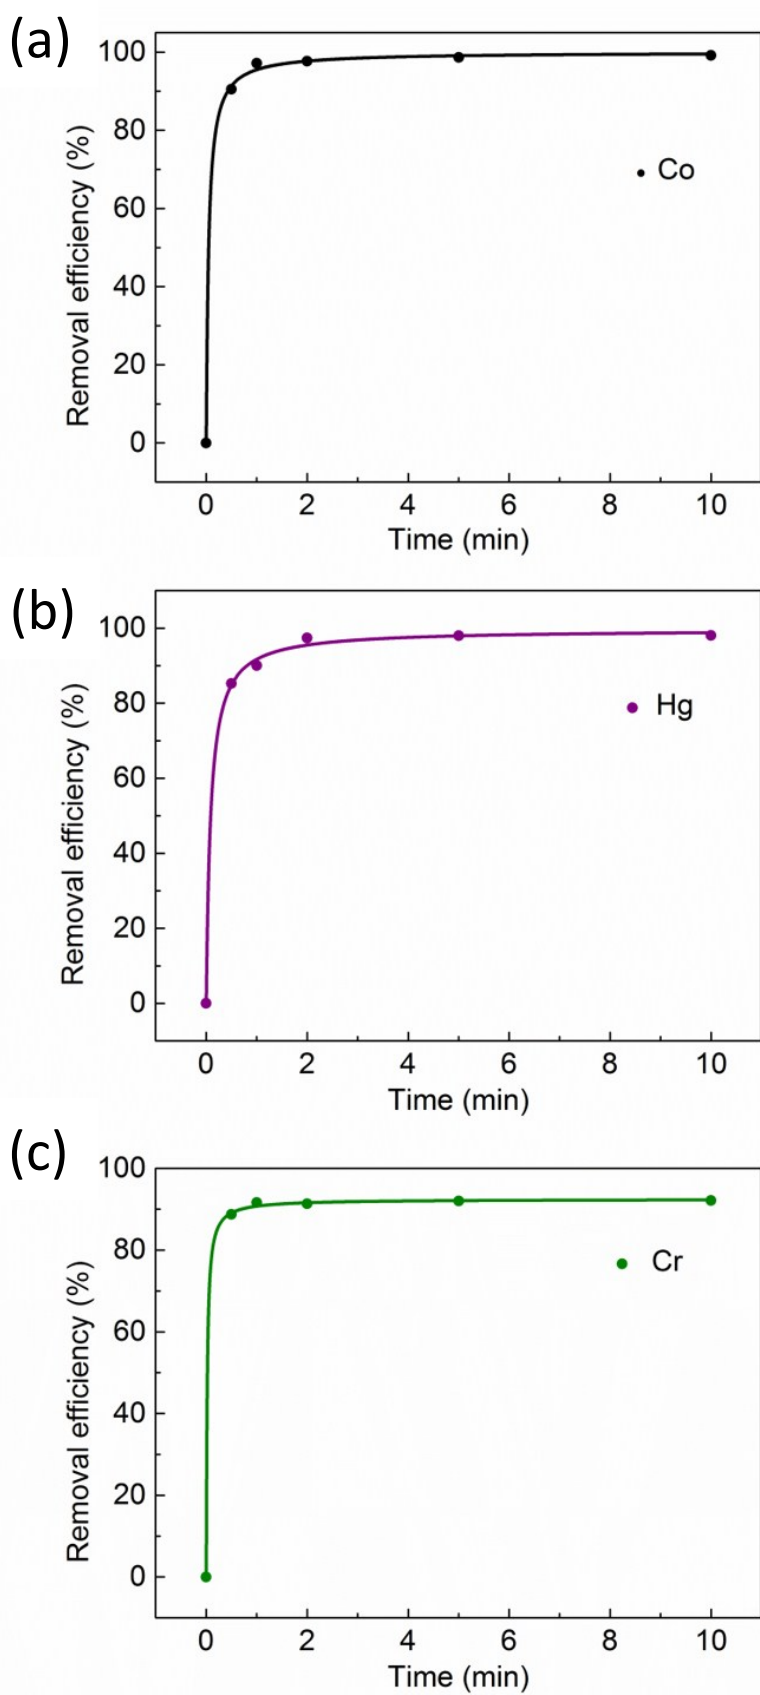

Fig. S12 Time-dependent removal of (a) Co(II), (b) Hg(II), and (c) Cr(II) by P-CDEC in batch

adsorption experiments.

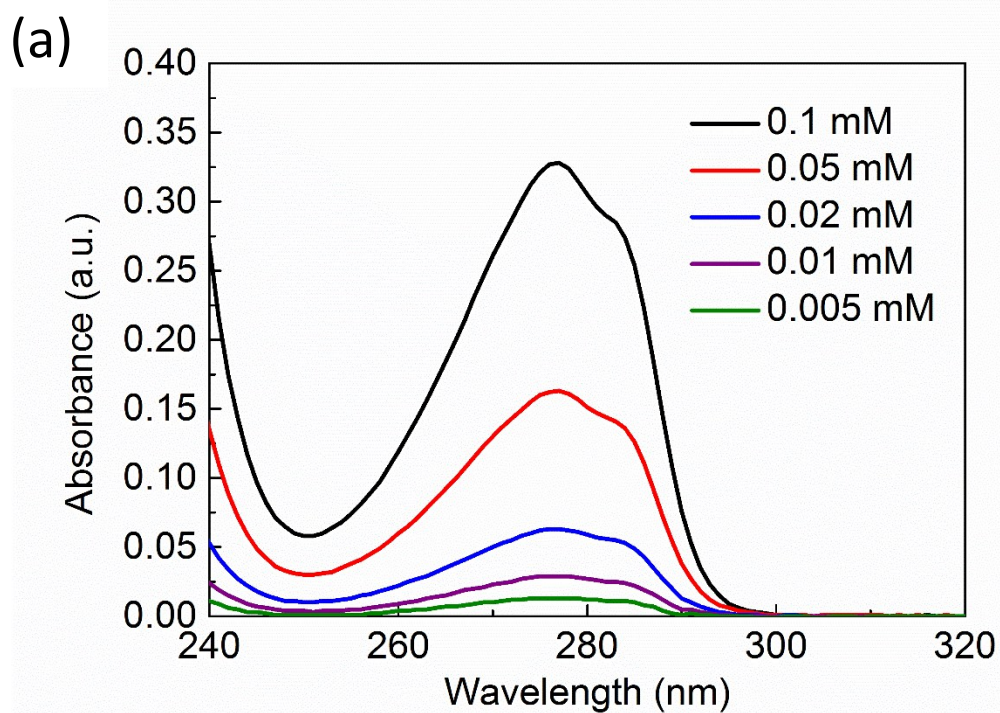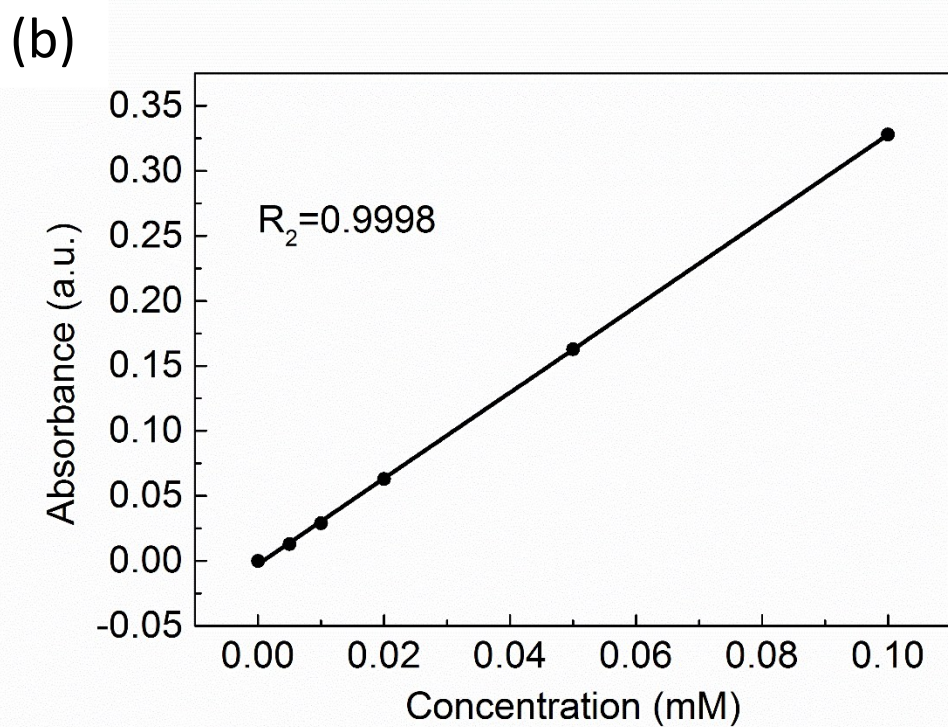

Fig. S13 (a) UV-Vis spectra of BPA of different concentrations. (b) Standard curve plotted based on the absorbance at 277 nm.

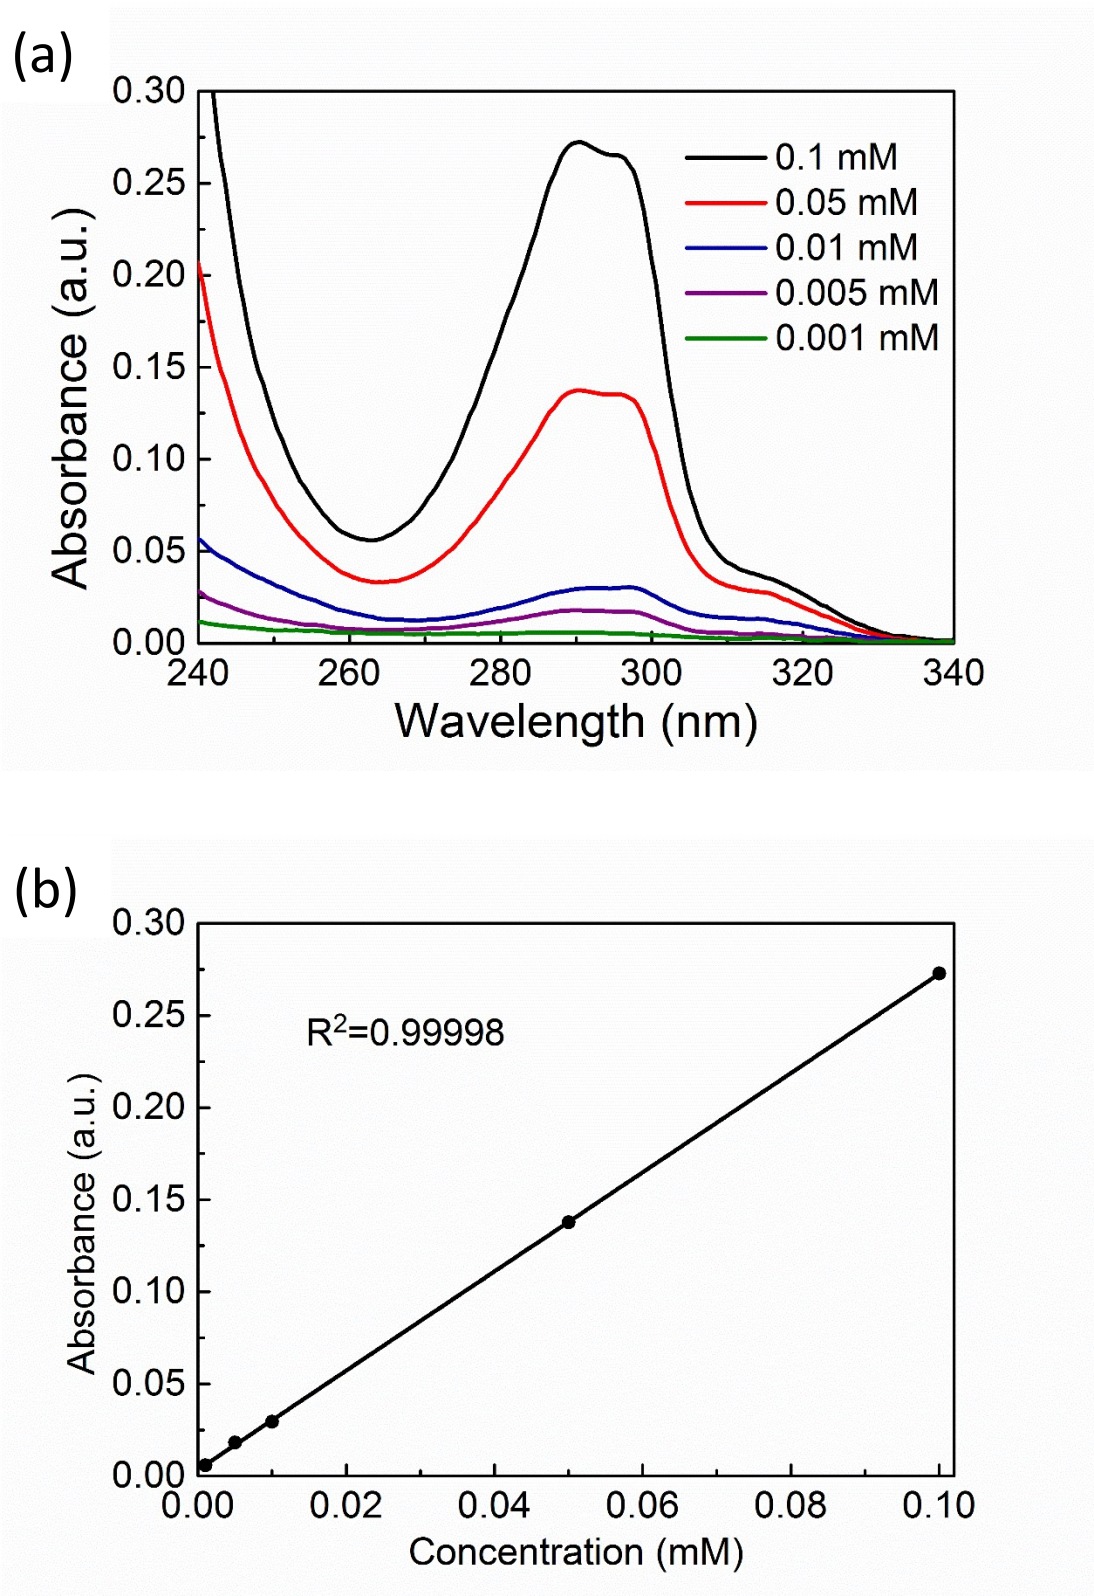

Fig. S14 (a) UV-Vis spectra of TCP of different concentrations. (b) Standard curve plotted based on the absorbance at 290.5 nm.

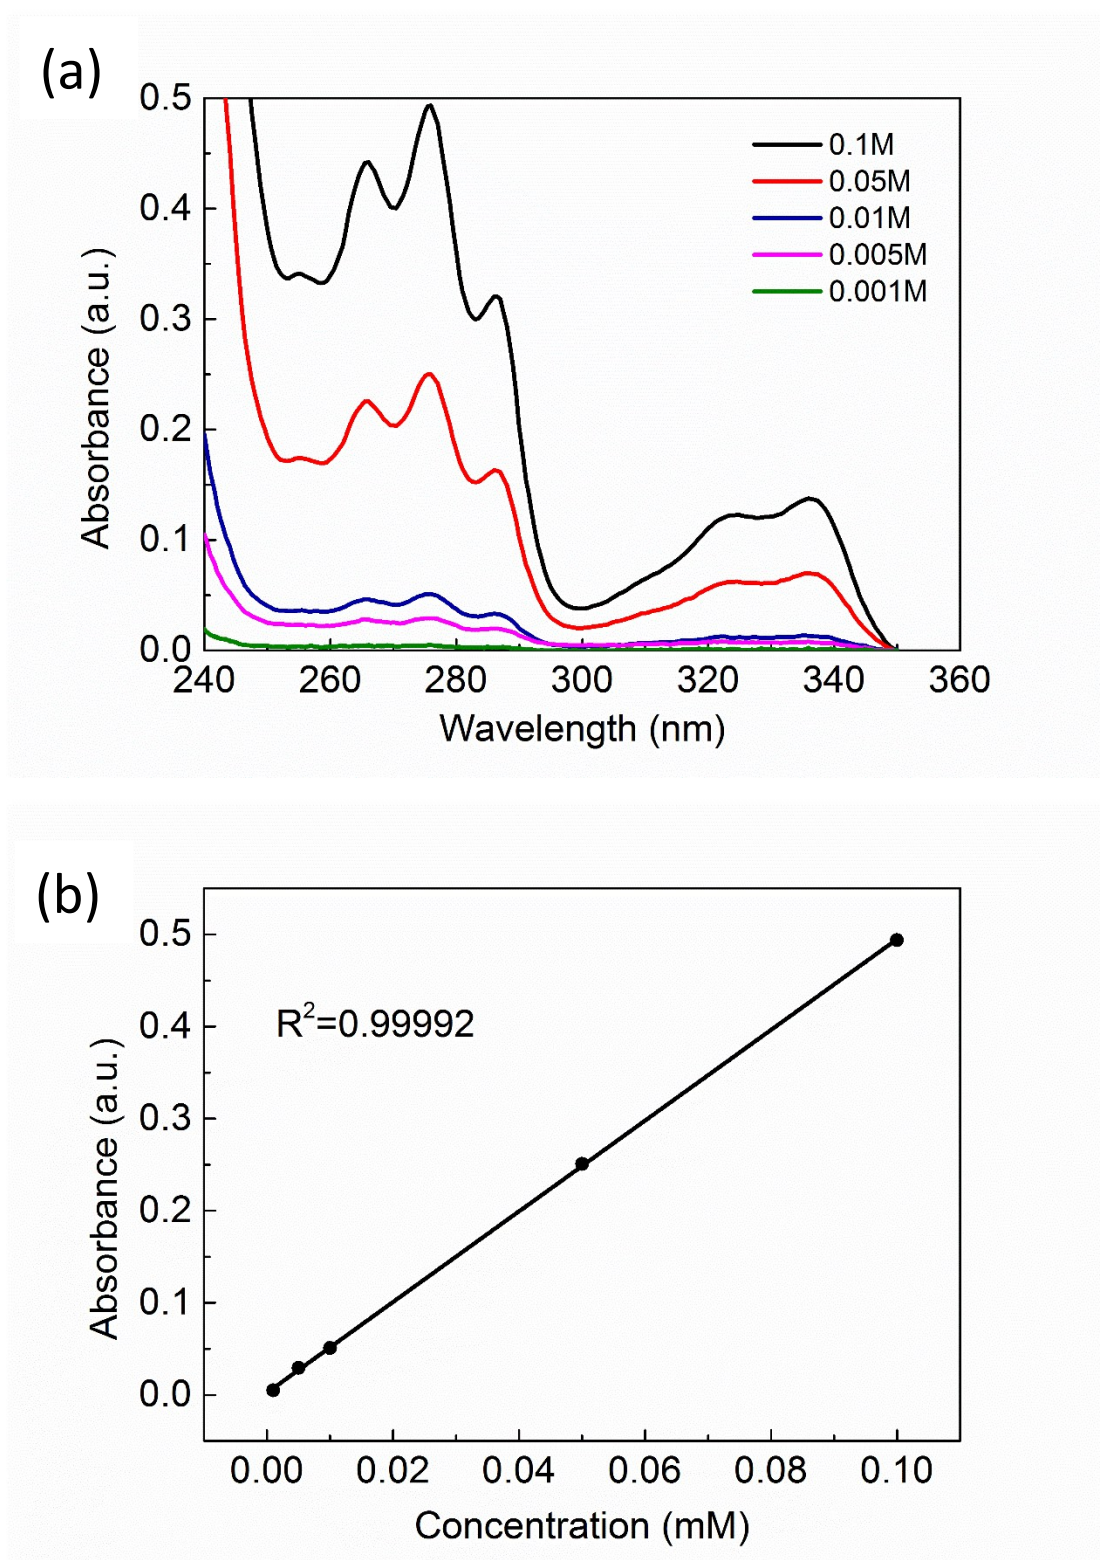

Fig. S15 (a) UV-Vis spectra of BNP of different concentrations. (b) Standard curve plotted based on the absorbance at 275.5 nm.

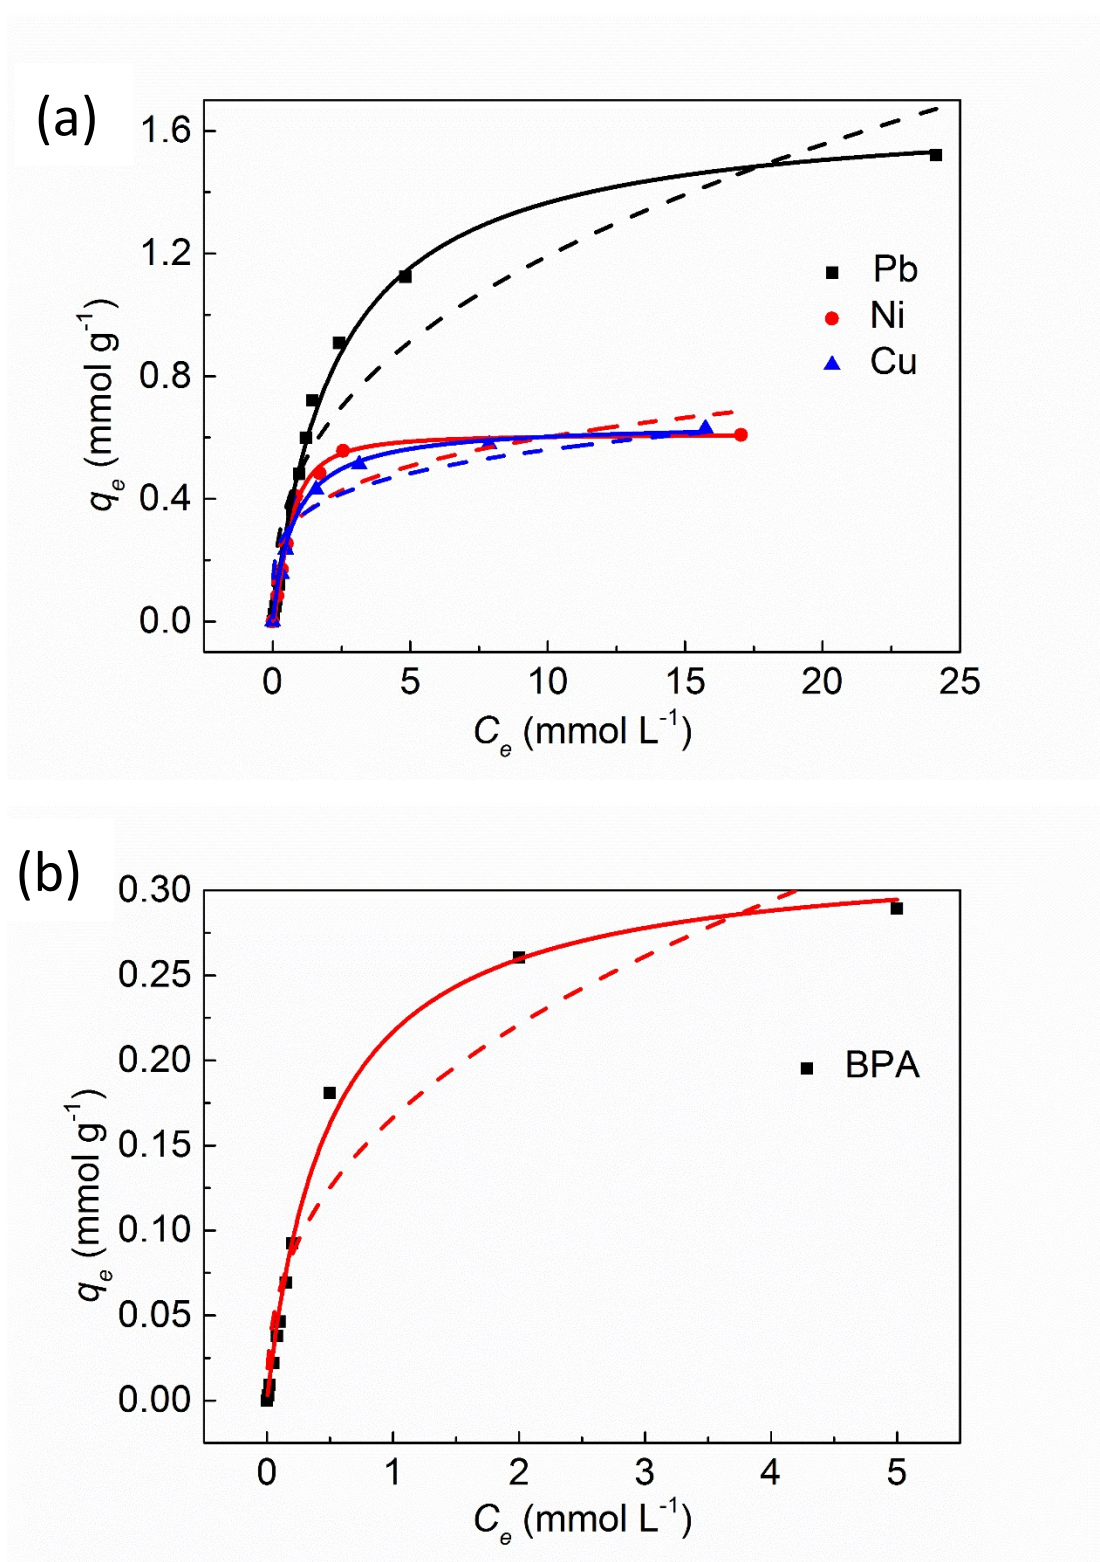

Fig. S16 Adsorption isotherms of metals (a) and BPA (b) on P-CDEC, fitting by Langmuir and Freundlich models. The solid line represents Langmuir models, the dash line represents Freundlich models.

Table S3 Adsorption capacity ( $q_e$ ) of P-CDEC in different initial concentrations ( $C_0$ ) of pollutants

| Pollutants | $C_0$ (mmol L <sup>-1</sup> ) | $q_e$ (mmol g <sup>-1</sup> ) |
|------------|-------------------------------|-------------------------------|
| Pb (II)    | 4.8                           | 1.12                          |
|            | 24.1                          | 1.52                          |
| Ni (II)    | 2.5                           | 0.56                          |
|            | 17                            | 0.61                          |
| Cu (II)    | 3.1                           | 0.51                          |
|            | 15.7                          | 0.63                          |
| BPA        | 2                             | 0.26                          |
|            | 5                             | 0.29                          |

Table S4 Isotherm parameters of Langmuir and Freundlich models for metals and organic pollutants adsorption

| Pollutants | Langmuir model                |                             |       | Freundlich model              |       |       |
|------------|-------------------------------|-----------------------------|-------|-------------------------------|-------|-------|
|            | $q_m$ (mmol g <sup>-1</sup> ) | $K_L$ (L mg <sup>-1</sup> ) | $R^2$ | $K_F$ (mmol g <sup>-1</sup> ) | $n_F$ | $R^2$ |
| Pb(II)     | 1.675                         | 0.442                       | 0.993 | 0.493                         | 2.6   | 0.883 |
| Ni(II)     | 0.471                         | 6.341                       | 0.984 | 0.341                         | 4.1   | 0.673 |
| Cu(II)     | 0.648                         | 1.324                       | 0.965 | 0.343                         | 4.7   | 0.799 |

### 1 Adsorption Isotherms

2 The Langmuir and Freundlich,<sup>2</sup> as two well-known and widely used models, were employed to  
 3 fit the adsorption equilibrium data of heavy metal ions and organic pollutants on P-CDEC. The  
 4 Langmuir model is based on homogeneous adsorption. The binding sites have the same adsorption  
 5 affinity and no interactions between adsorbates. The Langmuir equation is:

$$6 \quad q_e = \frac{q_m K_L C_e}{1 + K_L C_e} \quad (1)$$

7 where  $q_e$  (mg g<sup>-1</sup>) is the equilibrium adsorption capacity of the adsorbate,  $q_m$  (mg g<sup>-1</sup>) is the  
 8 maximum adsorption capacity of adsorbent, and  $C_e$  (mg L<sup>-1</sup>) is the equilibrium concentration of the  
 9 adsorbate, while  $K_L$  (L mg<sup>-1</sup>) is the Langmuir adsorption constant.

10 The Freundlich model expects the adsorption on a heterogeneous surface without saturation of  
 11 adsorbent binding sites:

$$12 \quad q_e = K_F C_e^{1/n_F} \quad (2)$$

13 where  $q_e$  (mg g<sup>-1</sup>) is the equilibrium adsorption capacity of the adsorbate,  $K_F$  (mg g<sup>-1</sup>) is a unit  
 14 capacity coefficient  $C_e$  (mg L<sup>-1</sup>) is the equilibrium concentration of the adsorbate, and  $n_F$  is the  
 15 Freundlich parameter related to the degree of system heterogeneity.

16 Figs. S15a and S15b illustrate that, compared with the Freundlich model, the Langmuir model is  
 17 fitter with the experimental data for both heavy metal ions and organic pollutants. This is further  
 18 confirmed by its correlation coefficients  $R^2$  values (Table S4). It might indicate homogeneous  
 19 distribution of adsorption active sites for metal ions and organic pollutants.

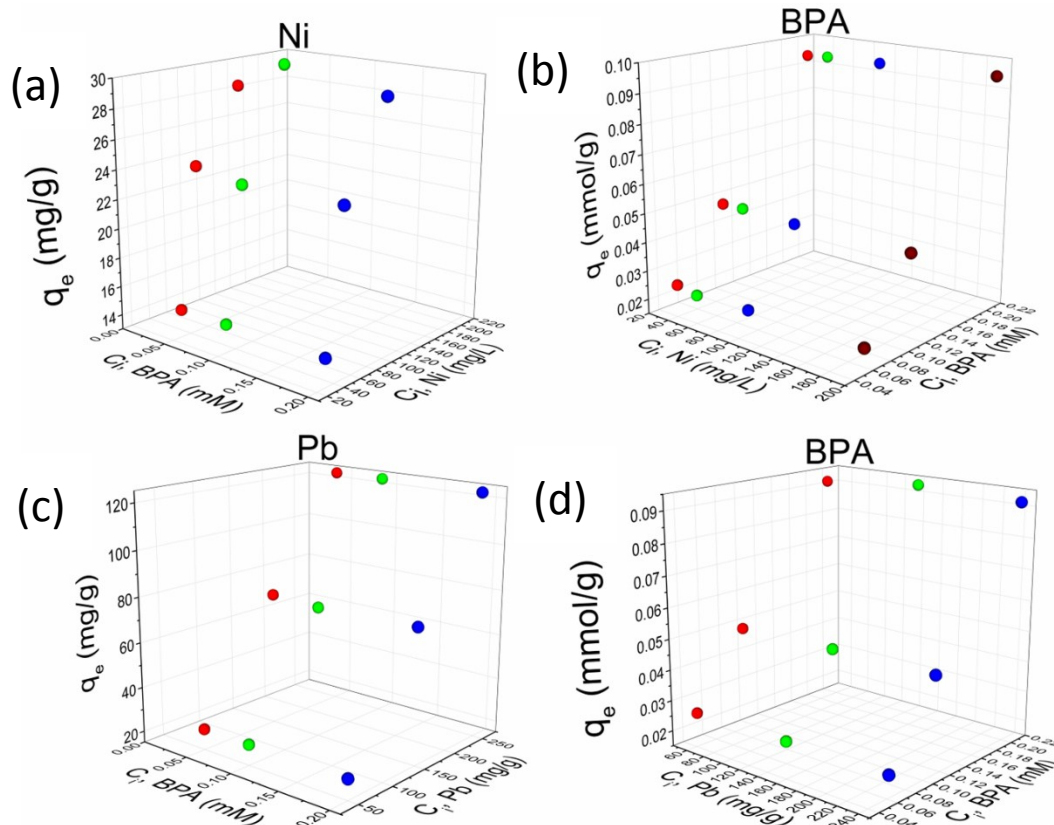

Fig. S17 Simultaneous adsorption of Cu(II), MB, SO, and CV on P-CDEC using binary solutions. Experimental conditions: 25 °C, pH 4.5, adsorbent dose 2 g L<sup>-1</sup>, and contact time 20min. The initial concentrations: for Ni(II) 30 mg L<sup>-1</sup> (red), 50 mg L<sup>-1</sup> (green), 100 mg L<sup>-1</sup> (blue), 200 mg L<sup>-1</sup> (brown); for Pb(II) 50 mg L<sup>-1</sup> (red), 150 mg L<sup>-1</sup> (green), 250 mg L<sup>-1</sup> (blue); for BPA 0.05mM (red), 0.1mM (green), 0.2mM (blue).



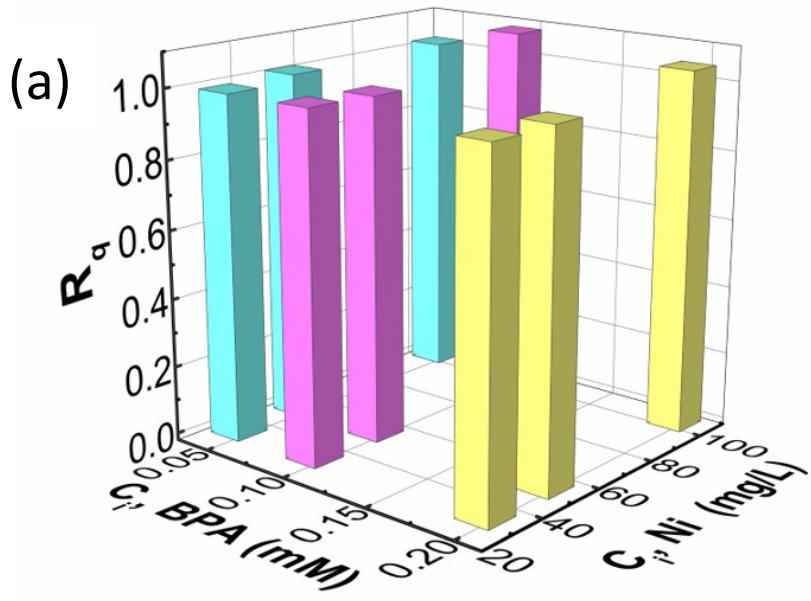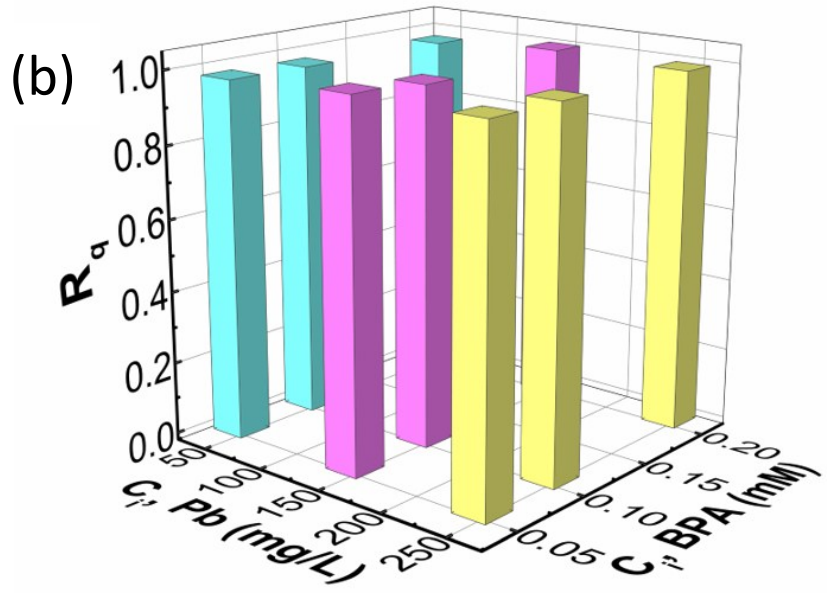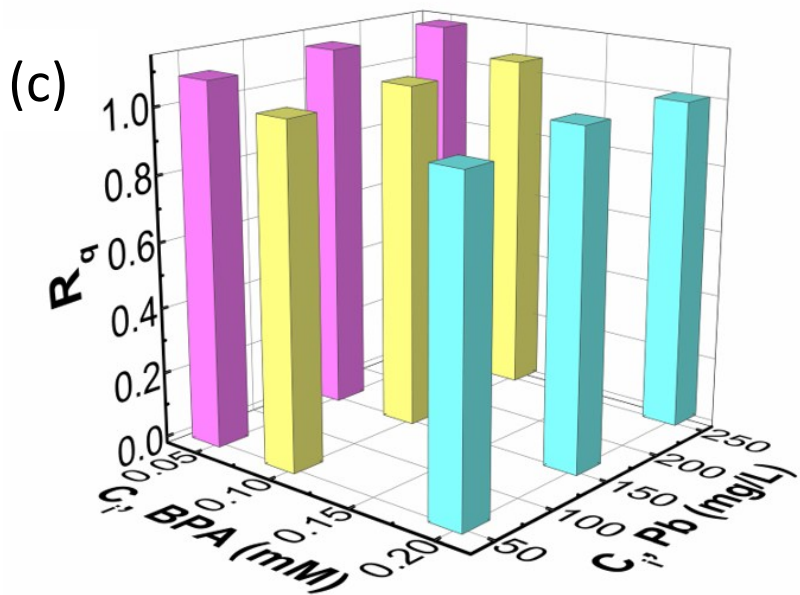

---

Fig. S18 Simultaneous adsorption studies P-CDEC.  $R_q$  versus the initial concentration of binary solutions for the simultaneous removal of BPA, Ni(II) and Pb(II) using P-CDEC. The initial concentrations: for Ni(II) 30 mg L<sup>-1</sup> (cyan), 50 mg L<sup>-1</sup> (magenta), 100 mg L<sup>-1</sup> (yellow); for Pb(II) 50 mg L<sup>-1</sup> (cyan), 150 mg L<sup>-1</sup> (magenta), 250 mg L<sup>-1</sup> (yellow); for BPA 0.05mM (magenta), 0.1mM (yellow), 0.2mM (cyan). (Dose, 2 g L<sup>-1</sup>; pH 4.5)

- 1 (1) Zhao, F.; Repo, E.; Yin, D.; Meng, Y.; Jafari, S.; Sillanpää, M. EDTA-cross-linked
- 2  $\beta$ -cyclodextrin: an environmentally friendly bifunctional adsorbent for simultaneous
- 3 adsorption of metals and cationic dyes. *Environ. Sci. Technol.* **2015**, *49*, 10570-10580.
- 4 (2) Wong, Y.; Szeto, Y.; Cheung, W.; McKay, G. Equilibrium studies for acid dye
- 5 adsorption onto chitosan. *Langmuir* **2003**, *19*, 7888-7894.
